# Supplementary material for: Hypoxia pathway and hypoxia-mediated extensive extramedullary hematopoiesis are involved in ursolic acid's anti-metastatic effect in 4T1 tumor bearing mice
Source: PubMed Central journal article supplement (PMC5342124; doi:10.18632/oncotarget.12375), 2016-09-30
Supplement: oncotarget-07-71802-s001.pdf [file oncotarget-07-71802-s001.pdf]

## Hypoxia pathway and hypoxia-mediated extensive extramedullary hematopoiesis are involved in ursolic acid's anti-metastatic effect in 4T1 tumor bearing mice

### Supplementary Materials

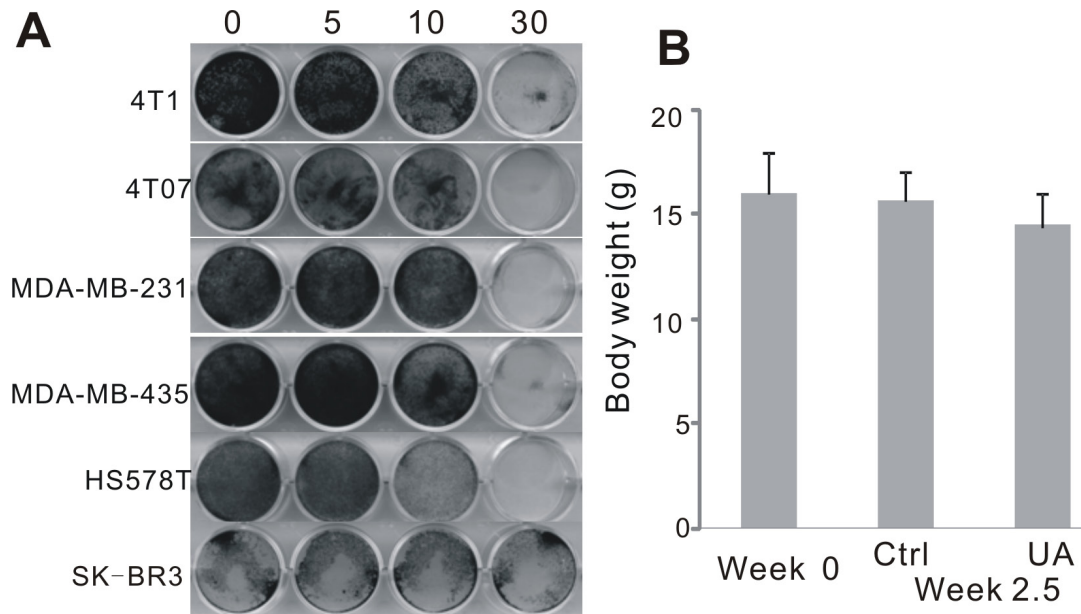

**Supplementary Figure S1:** (A) Effect of UA on the proliferation of breast cancer cells. Different kinds of breast cancer cells were treated with designed concentration for 48 hours and stained with crystal violet. (B) The effect of UA on mice body weight after 18 days treatment.

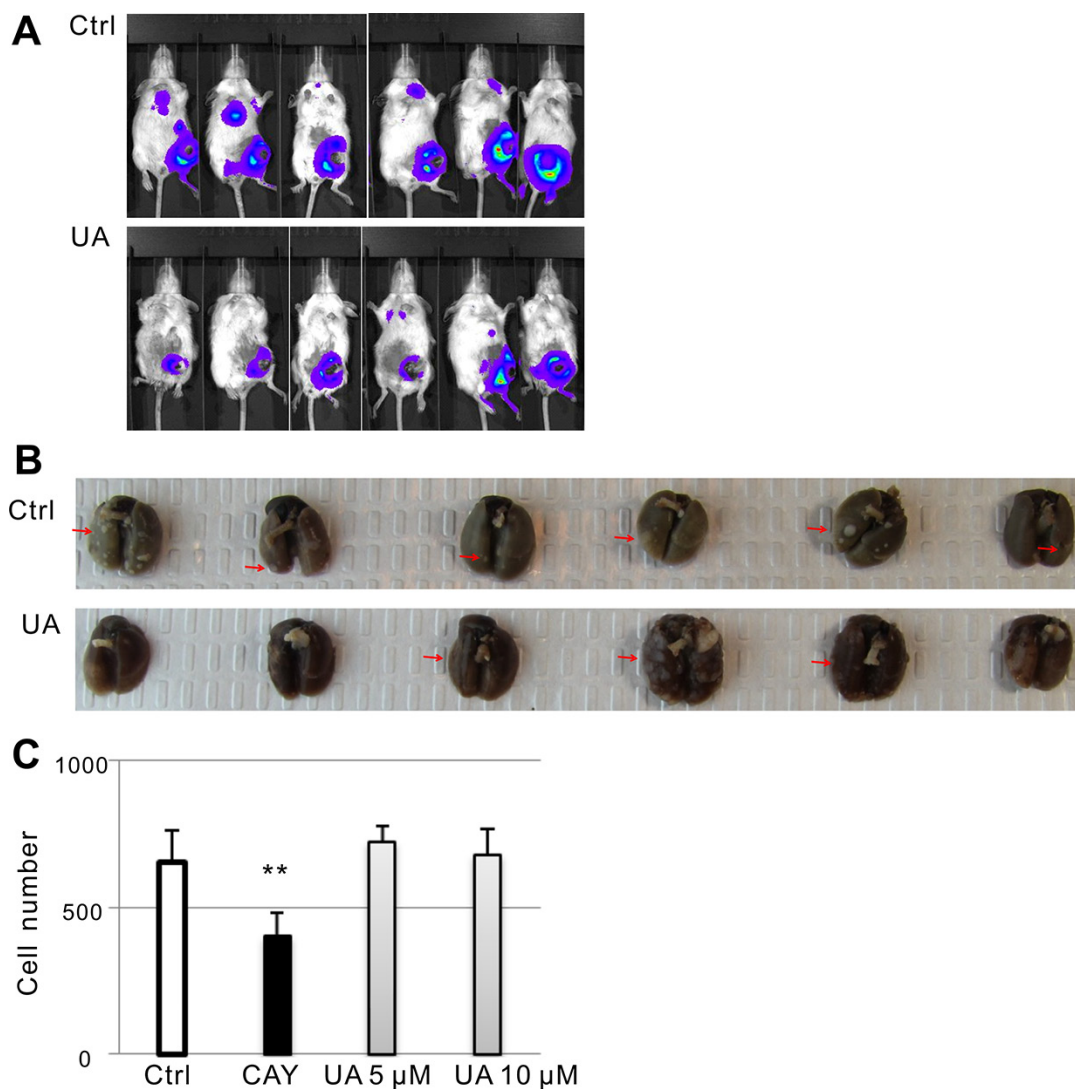

**Supplementary Figure S2: Effect of UA on tumor growth and metastasis *in vivo*.** (A) The Xenogen images of control group and UA treated group mice after 4 weeks UA treatment. UA suppressed the lung metastasis (top panel, control; bottom panel, UA group). Briefly, luciferase-tagged 4T1 cells were collected and injected into the mammary fat pad of BALB/c mice ( $0.5 \times 10^5$  cells/injection; six animals per assay condition). Animals were treated with 20 mg/kg UA and subjected to Xenogen imaging weekly. (B) The effect of UA on lung metastasis (control, top panel; UA group, bottom panel). Red arrow indicated the lung with metastasis; one representative animal from each group are shown. (C) UA didn't affect the cell invasion in MDA-MB-231 cells *in vitro*.

**Supplementary Table S1: Primer sequences of target genes and housekeeping gene for RT-PCR**

| Gene            | Forward Primer       | Reverse Primer       |
|-----------------|----------------------|----------------------|
| human HIF1alpha | TGCATCTCCATCTCCTACCC | CGTTAGGGCTTCTTGATGA  |
| human VEGF a    | CCCACTGAGGAGTCCAACAT | TTTCTTGCGCTTTCGTTTTT |
| human VHL       | GGTGGCATTGCTTCCTA    | CAGTCTTCCCAAAGCAGGAG |
| human p53       | GGCCCACTTCACCGTACTAA | GTGGTTTCAAGGCCAGATGT |
| human Cyclin D1 | TGTTTGCAAGCAGGACTTTG | TGGCACCAAAGGATTCCTAA |
| human E2F1      | ATGTTTTCTGTGCCCTGAG  | ATCTGTGGTGAGGGATGAGG |
| human Jun       | CAGGTGGCACAGCTTAAACA | TTTTTCTCTCCGTCGCAACT |
| human MDM2      | CCGAATAAGGTTGCCTGAA  | CAAATTGCAAAAGGCACTGA |
| human AKT1      | AGAAGCAGGAGGAGGAGGAG | TCTCCTTCACCAGGATCACC |
| human ERK1      | CCAGACCATGATCACACAGG | CTGGAAAGATGGGCCTGTTA |
| human GAPDH     | CAGCGACACCCACTCCTC   | TGAGGTCCACCACCCTGT   |

HIF1alpha, hypoxia-inducible factor 1 alpha; VEGF a, vascular endothelial growth factor a; VHL, von Hippel-Lindau; p53, protein 53; MDM2, murine double minute 2; AKT1, thymoma viral proto-oncogene 1; ERK1, extracellular regulated protein kinases 1; GAPDH, glyceraldehyde-3-phosphate dehydrogenase.
